# Supplementary figures and images for: Electron affinities of the radicals derived from cytosine
Source: Royal Society of Chemistry journal article supplement (doi:10.1039/b415653f), 2005-01-01

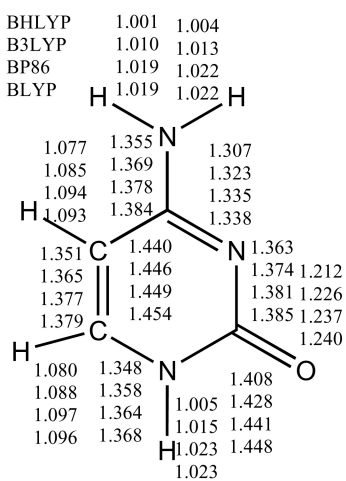

**1**

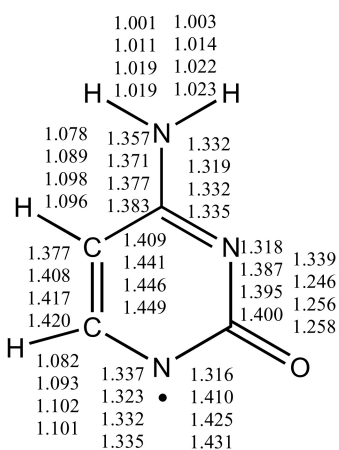

**2**

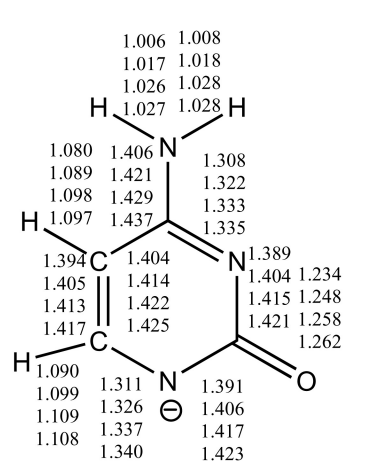

**3**

| D(2,3,4,5) | D(3,4,8,8a) | D(3,4,8,8b) |
|------------|-------------|-------------|
| 177.8      | 11.6        | 165.5       |
| 177.7      | 11.1        | 163.2       |
| 176.8      | 11.0        | 163.1       |
| 177.2      | 11.0        | 163.2       |

| D(2,3,4,5) | D(3,4,8,8a) | D(3,4,8,8b) |
|------------|-------------|-------------|
| -177.9     | -18.4       | -144.8      |
| -177.5     | -18.6       | -143.5      |
| -177.0     | -18.9       | -142.0      |
| -177.0     | -18.9       | -142.3      |

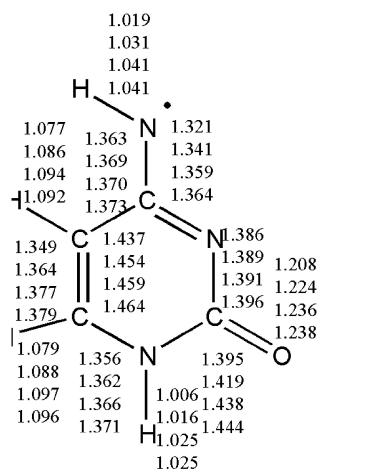

**4**

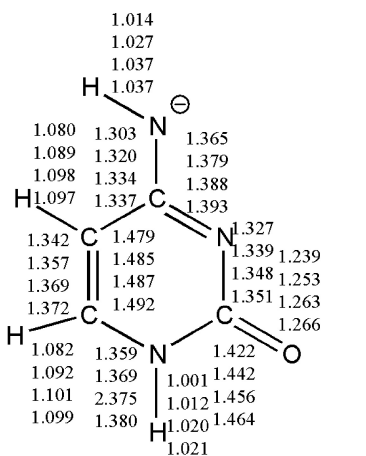

**5**

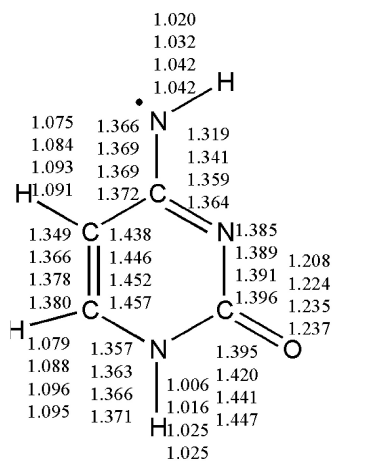

**6**

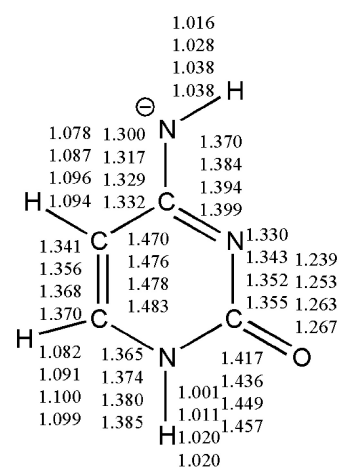

**7**

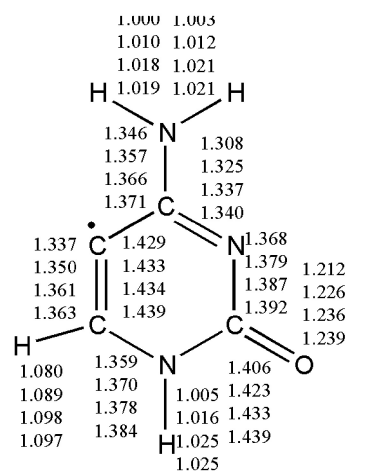

**8**

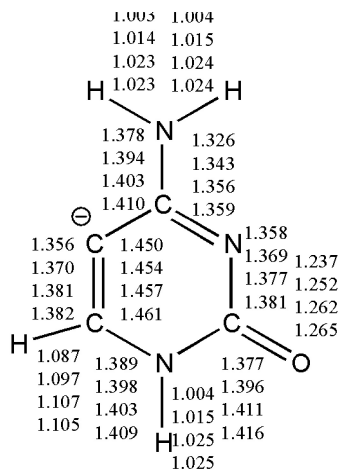

**9**

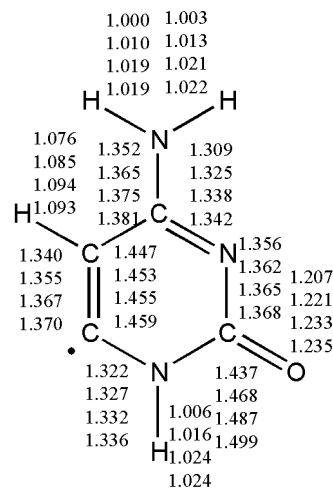

**10**

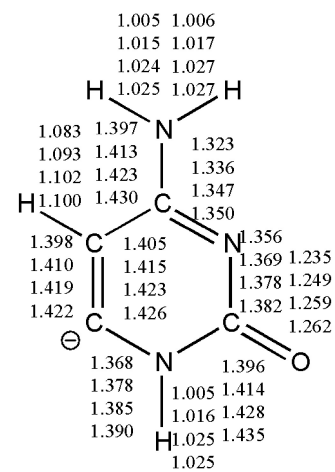

**11**

| D(2,3,4,5) | D(3,4,8,8a) | D(3,4,8,8b) |
|------------|-------------|-------------|
| -179.9     | -0.4        | -179.5      |
| 179.4      | 3.4         | 176.0       |
| -178.4     | -8.6        | -170.2      |
| -178.5     | -7.6        | -171.4      |

| D(2,3,4,5) | D(3,4,8,8a) | D(3,4,8,8b) |
|------------|-------------|-------------|
| -178.2     | -19.6       | -162.4      |
| -178.0     | -21.3       | -161.5      |
| -177.8     | -23.1       | -160.5      |
| -177.8     | -22.9       | -160.5      |

| D(2,3,4,5) | D(3,4,8,8a) | D(3,4,8,8b) |
|------------|-------------|-------------|
| -178.8     | -7.0        | -170.3      |
| -178.5     | -8.9        | -168.1      |
| -177.9     | -11.9       | -164.7      |
| -177.9     | -11.8       | -165.1      |

| D(2,3,4,5) | D(3,4,8,8a) | D(3,4,8,8b) |
|------------|-------------|-------------|
| -178.3     | -20.6       | -151.1      |
| -177.9     | -21.1       | -149.8      |
| -177.6     | -21.6       | -148.2      |
| -177.6     | -21.5       | -148.4      |

Supplement: fs1.pdf [file fs1.pdf]

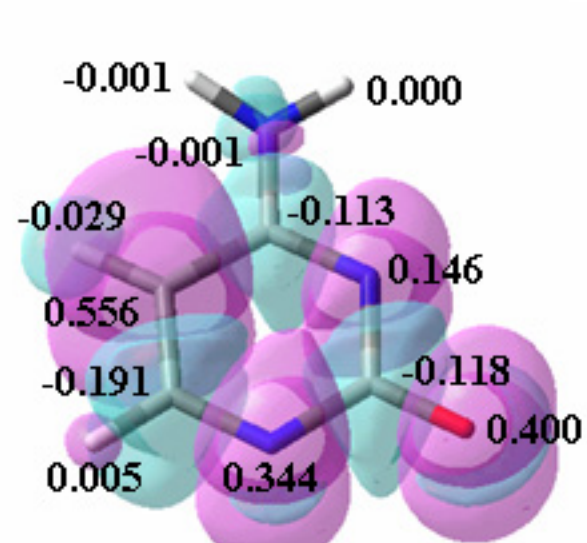

2

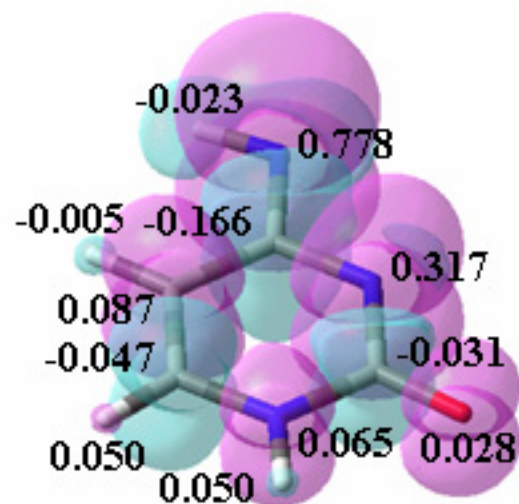

4

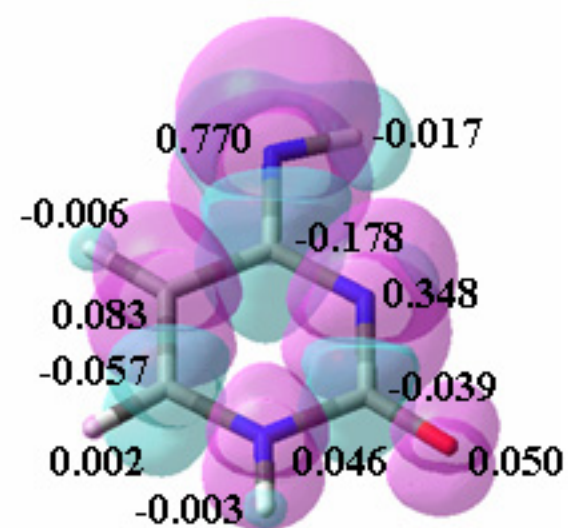

6

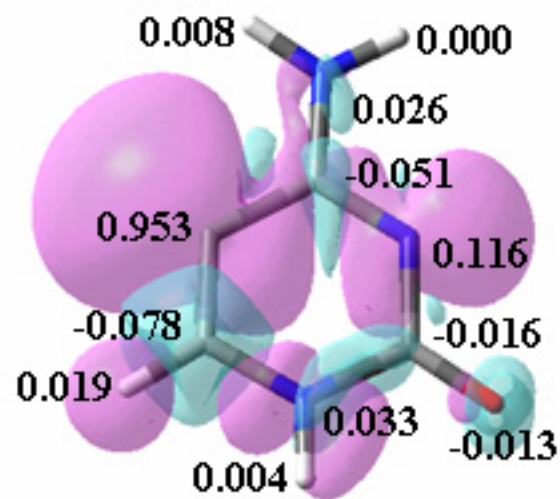

8

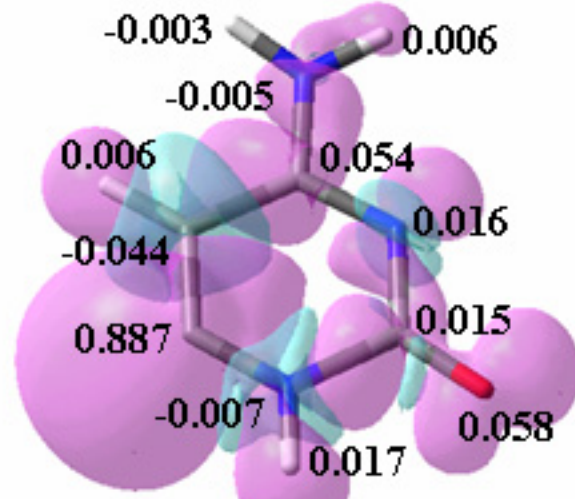

10

Supplement: fs2.pdf [file fs2.pdf]
